# Supplementary material
Source: publisher figshare collection journal article supplement (https://tandf.figshare.com/ndownloader/files/34842981)
Supplement: Supplementary file 1 [file 34842981]

Supplementary Material to  
*Bias analysis for misclassification errors in both the  
response variable and covariate*

Juxin Liu\*

liu@math.usask.ca

Department of Mathematics and Statistics, University of Saskatchewan,  
Saskatoon, S7N 5E6, Canada

Annshirley Afful

aaa877@math.usask.ca

Department of Mathematics and Statistics, University of Saskatchewan,  
Saskatoon, S7N 5E6, Canada

Holly Mansell

holly.mansell@usask.ca

College of Pharmacy and Nutrition, University of Saskatchewan,  
Saskatoon, S7N 5E5, Canada

Yanyuan Ma

yzm63@psu.edu

Department of Statistics, Pennsylvania State University,  
University Park, PA 16802

April 10, 2022

---

\*Corresponding author

# 1. Supplementary notes

**Supplementary Note 1: Proof of the relations among the dependence parameters when  $Y/Y^*$  and  $X/X^*$  are binary variables.**

$$\begin{aligned}
& P(Y^* = y, X^* = 1 - x|Y = y, X = x) - P(Y^* = y|Y = y, X = x)P(X^* = 1 - x|Y = y, X = x) \\
= & P(Y^* = y|Y = y, X = x) - P(Y^* = y, X^* = x|Y = y, X = x) \\
& - P(Y^* = y|Y = y, X = x) + P(Y^* = y|Y = y, X = x)P(X^* = x|Y = y, X = x) \\
= & -\left(P(Y^* = y, X^* = x|Y = y, X = x) - P(Y^* = y|Y = y, X = x)P(X^* = x|Y = y, X = x)\right) \\
= & -D_{yx},
\end{aligned}$$

$$\begin{aligned}
& P(Y^* = 1 - y, X^* = x|Y = y, X = x) - P(Y^* = 1 - y|Y = y, X = x)P(X^* = x|Y = y, X = x) \\
= & P(X^* = x|Y = y, X = x) - P(Y^* = y, X^* = x|Y = y, X = x) \\
& - P(X^* = x|Y = y, X = x) + P(Y^* = y|Y = y, X = x)P(X^* = x|Y = y, X = x) \\
= & -\{P(Y^* = y, X^* = x|Y = y, X = x) - P(Y^* = y|Y = y, X = x)P(X^* = x|Y = y, X = x)\} \\
= & -D_{yx},
\end{aligned}$$

and

$$\begin{aligned}
& P(Y^* = 1 - y, X^* = 1 - x|Y = y, X = x) - \\
& P(Y^* = 1 - y|Y = y, X = x)P(X^* = 1 - x|Y = y, X = x) \\
= & P(X^* = 1 - x|Y = y, X = x) - P(Y^* = y, X^* = 1 - x|Y = y, X = x) - \\
& P(X^* = 1 - x|Y = y, X = x) + P(Y^* = y|Y = y, X = x)P(X^* = 1 - x|Y = y, X = x) - \\
& P(Y^* = y|Y = y, X = x)P(X^* = x|Y = y, X = x) \\
= & -P(Y^* = y, X^* = 1 - x|Y = y, X = x) + P(Y^* = y|Y = y, X = x)P(X^* = 1 - x|Y = y, X = x) \\
= & D_{yx}.
\end{aligned}$$

## Supplementary Note 2: Relationship between $\mathbf{p}$ and $\mathbf{p}^*$

Recall  $\mathbf{p}^*$  and  $\mathbf{p}$  represent the joint distribution for  $(Y^*, X^*)$  and  $(Y, X)$ , respectively when both variables are binary.

$$\begin{aligned}
\mathbf{p}^* &= M\mathbf{p} \\
\mathbf{p}^* &= \{(M_Y \otimes \mathbf{1}) \circ (\mathbf{1} \otimes M_X) + \mathbf{D}\}\mathbf{p},
\end{aligned} \tag{S.1}$$

where  $\otimes$  is the Kronecker product and  $\circ$  is the Hadamard product (i.e., elementwise multiplication of matrices) and

$$\begin{aligned}\mathbf{1} &= (1, 1)', \\ M_Y &= \begin{pmatrix} SN_{Y1} & SN_{Y0} & 1 - SP_{Y1} & 1 - SP_{Y0} \\ 1 - SN_{Y1} & 1 - SN_{Y0} & SP_{Y1} & SP_{Y0} \end{pmatrix}, \\ M_X &= \begin{pmatrix} SN_{X1} & SN_{X0} & 1 - SP_{X1} & 1 - SP_{X0} \\ 1 - SN_{X1} & 1 - SN_{X0} & SP_{X1} & SP_{X0} \end{pmatrix}, \\ \mathbf{D} &= \begin{pmatrix} D_{11} & -D_{10} & -D_{01} & D_{00} \\ -D_{11} & D_{10} & D_{01} & -D_{00} \\ -D_{11} & D_{10} & D_{01} & -D_{00} \\ D_{11} & -D_{10} & -D_{01} & D_{00} \end{pmatrix}.\end{aligned}$$

For *nondifferential* misclassification, (S.2) holds and can be further simplified to

$$\mathbf{p}^* = (M_Y \otimes M_X + \mathbf{D})\mathbf{p}, \quad (\text{S.2})$$

where  $\otimes$  is the Kronecker product and

$$M_Y = \begin{pmatrix} SN_Y & 1 - SP_Y \\ 1 - SN_Y & SP_Y \end{pmatrix}, \quad M_X = \begin{pmatrix} SN_X & 1 - SP_X \\ 1 - SN_X & SP_X \end{pmatrix}.$$

### Supplementary Note 3: Derivations of $L_v$ and $L_m$ for binary $Y$ and $X$

In the most general setting with differential and dependent misclassification errors for binary  $Y$  and  $X$ , the likelihood function based on validation data is

$$\begin{aligned}L_v(\boldsymbol{\theta}) &= \prod_{i=1}^{n_v} p_{y_i x_i} \left[ \left\{ SN_{Y x_i}^{y_i^*} (1 - SN_{Y x_i})^{1-y_i^*} \right\}^{y_i} \left\{ 1 - SP_{Y x_i}^{y_i^*} (1 - SP_{Y x_i})^{1-y_i^*} \right\}^{1-y_i} \right. \\ &\quad \left. \left\{ SN_{X y_i}^{x_i^*} (1 - SN_{X y_i})^{1-x_i^*} \right\}^{x_i} \left\{ SN_{X y_i}^{x_i^*} (1 - SN_{X y_i})^{1-x_i^*} \right\}^{1-x_i} \right. \\ &\quad \left. + (-1)^{I(y_i^*=y_i)+I(x_i^*=x_i)} D_{y_i x_i} \right].\end{aligned}$$

Using the rule of total probability and definition of the dependence parameters, we have

$$\begin{aligned}L_m(\boldsymbol{\theta}) &= \prod_{i=n_v+1}^n \sum_{yx} p_{yx} \left\{ P(Y_i^* = y_i^* | Y_i = y) P(X_i^* = x_i^* | X_i = x) + D_{yx} (-1)^{I(y_i^*=y)+I(x_i^*=x)} \right\} \\ &= \prod_{i=n_v+1}^n \sum_{yx} p_{yx} \left[ \left\{ SN_{Y x}^{y_i^*} (1 - SN_{Y x})^{1-y_i^*} \right\}^y \left\{ (1 - SP_{Y x})^{y_i^*} SP_{Y x}^{1-y_i^*} \right\}^{1-y} \left\{ SN_{X y}^{x_i^*} (1 - SN_{X y})^{1-x_i^*} \right\}^x \right. \\ &\quad \left. \left\{ (1 - SP_{X y})^{x_i^*} SP_{X y}^{1-x_i^*} \right\}^{1-x} + (-1)^{I(y_i^*=y)+I(x_i^*=x)} D_{yx} \right], \\ &= \prod_{i=n_v+1}^n \left( L_{m, ind}(\boldsymbol{\theta} | y_i^*, x_i^*) + (-1)^{(y_i^*+x_i^*)} \delta \right).\end{aligned} \quad (\text{S.3})$$

## Supplementary Note 4: Boundaries of $D$ parameters.

The proof is given in a general setting, that is, categorical  $Y$  and  $X$ . Let  $D_{ij,st} = P(Y^* = i, X^* = j|Y = s, X = t) - P(Y^* = i|Y = s, X = t)P(X^* = j|Y = s, X = t)$ . Because

$$P(Y^* = i, X^* = j|Y = s, X = t) \leq P(Y^* = i|Y = s, X = t),$$

we have

$$\begin{aligned} D_{ij,st} &\leq P(Y^* = i|Y = s, X = t) - P(Y^* = i|Y = s, X = t)P(X^* = j|Y = s, X = t) \\ &= P(Y^* = i|Y = s, X = t)(1 - P(X^* = j|Y = s, X = t)). \end{aligned}$$

Similarly

$$\begin{aligned} D_{ij,st} &\leq P(X^* = j|Y = s, X = t) - P(Y^* = i|Y = s, X = t)P(X^* = j|Y = s, X = t) \\ &= P(X^* = j|Y = s, X = t)(1 - P(Y^* = i|Y = s, X = t)). \end{aligned}$$

On the other hand, due to the fact  $P(A \cap B) = P(A) + P(B) - P(A \cup B) \geq P(A) + P(B) - 1$ , we have

$$\begin{aligned} D_{ij,st} &\geq P(Y^* = i|Y = s, X = t) + P(X^* = j|Y = s, X = t) - 1 - \\ &\quad P(Y^* = i|Y = s, X = t)P(X^* = j|Y = s, X = t) \\ &= -(1 - P(Y^* = i|Y = s, X = t))(1 - P(X^* = j|Y = s, X = t)). \end{aligned}$$

Moreover, simply dropping the first item in the definition of  $D_{ij,st}$ ,

$$D_{ij,st} \geq -P(Y^* = i|Y = s, X = t)P(X^* = j|Y = s, X = t).$$

Note that for binary case under the nondifferential misclassification assumption,

$$\begin{aligned} P(Y^* = i|Y = s, X = t) &= P(Y^* = i|Y = s) \\ &= SN_Y^{is}(1 - SN_Y)^{(1-i)s}SP_Y^{(1-i)(1-s)}(1 - SP_Y)^{i(1-s)}, \\ P(X^* = j|Y = s, X = t) &= P(X^* = j|X = t) \\ &= SN_X^{jt}(1 - SN_X)^{(1-j)t}SP_X^{(1-j)(1-t)}(1 - SP_X)^{j(1-t)}. \end{aligned}$$

## Supplementary Note 5: Proof of $\delta = E(\text{cov}(Y^*, X^*|Y, X))$ .

The proof is for a general setting with differential misclassification errors in both  $Y$  and  $X$ , which includes nondifferential misclassification errors as a special case. By definition of covariance, we have

$$\begin{aligned} \text{cov}(Y^*, X^*|Y, X) &= E(Y^*X^*|Y, X) - E(Y^*|Y, X)E(X^*|Y, X) \\ &= P(Y^* = X^* = 1|Y, X) - P(Y^* = 1|Y, X)P(X^* = 1|Y, X). \end{aligned}$$

Also we have

$$\begin{aligned}
E(P(Y^* = X^* = 1|Y, X)) &= \sum_{y,x} P(Y^* = X^* = 1|Y = y, X = x)p_{yx} \\
&= (D_{11} + SN_{Y1}SN_{X1})p_{11} + (-D_{10} + SN_{Y0}(1 - SP_{X1}))p_{10} + \\
&\quad (-D_{01} + (1 - SP_{Y1})SN_{X0})p_{01} + (D_{00} + (1 - SP_{Y0})(1 - SP_{X0}))p_{00} \\
&= \delta + SN_{Y1}SN_{X1}p_{11} + SN_{Y0}(1 - SP_{X1})p_{10} + (1 - SP_{Y1})SN_{X0}p_{01} + (1 - SP_{Y0})(1 - SP_{X0})p_{00}.
\end{aligned}$$

While

$$\begin{aligned}
E(P(Y^* = 1|Y, X)P(X^* = 1|Y, X)) &= \sum_{y,x} P(Y^* = 1|Y = y, X = x)P(X^* = 1|Y = y, X = x)p_{y,x} \\
&= SN_{Y1}SN_{X1}p_{11} + SN_{Y0}(1 - SP_{X1})p_{10} + (1 - SP_{Y1})SN_{X0}p_{01} + (1 - SP_{Y0})(1 - SP_{X0})p_{00}.
\end{aligned}$$

Therefore, combining the above three equalities together, we have  $\delta = E(\text{cov}(Y^*, X^*|Y, X))$ .

## 2. Supplementary plots

### 2.1 Binary variables

Here are the plots for the simulation scenario in Section 4.1 when  $X$  and/or  $Y$  is subject to differential errors.

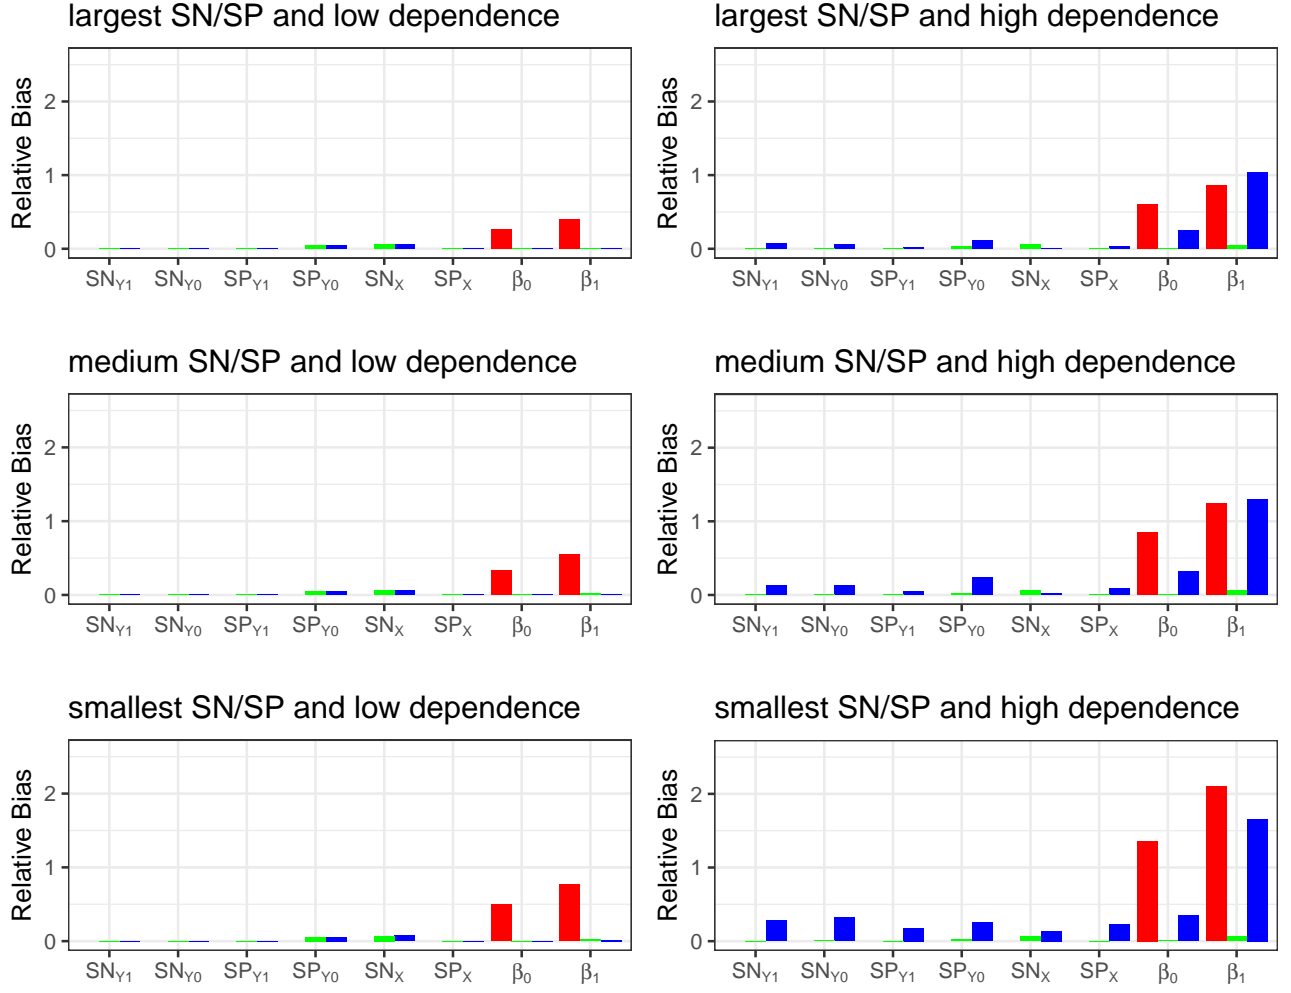

Figure S.1: Relative bias of model parameters when  $Y$  is subject to differential misclassification error and  $X$  is subject to nondifferential misclassification error with  $n_v/n = 10\%$ : red for naïve model, blue for independent misclassification error model, green for dependent misclassification model.

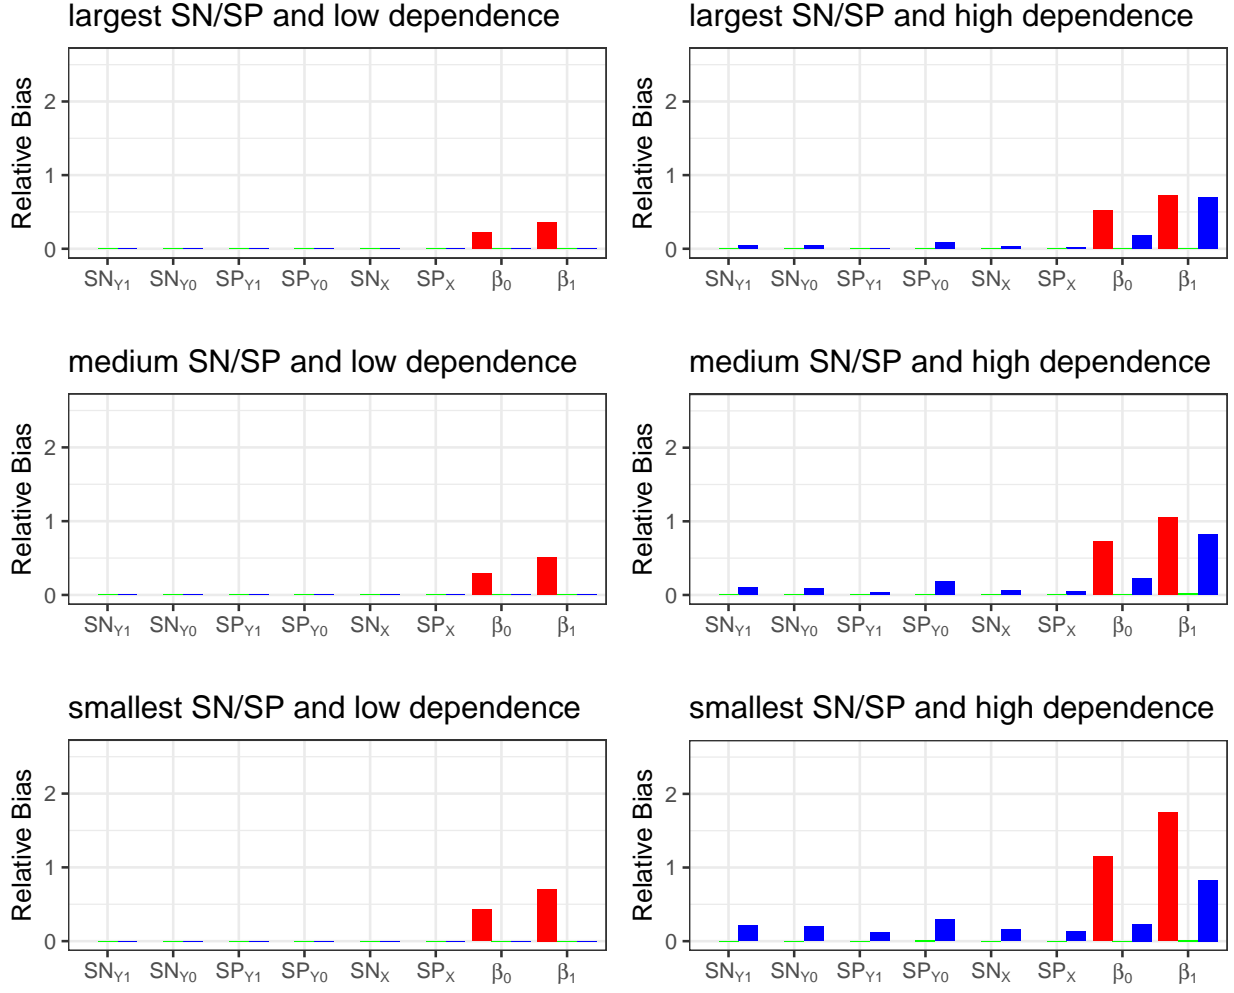

Figure S.2: Relative bias of model parameters when  $Y$  is subject to differential misclassification error and  $X$  is subject to nondifferential misclassification error with  $n_v/n = 30\%$ : red for naïve model, blue for independent misclassification error model, green for dependent misclassification model.

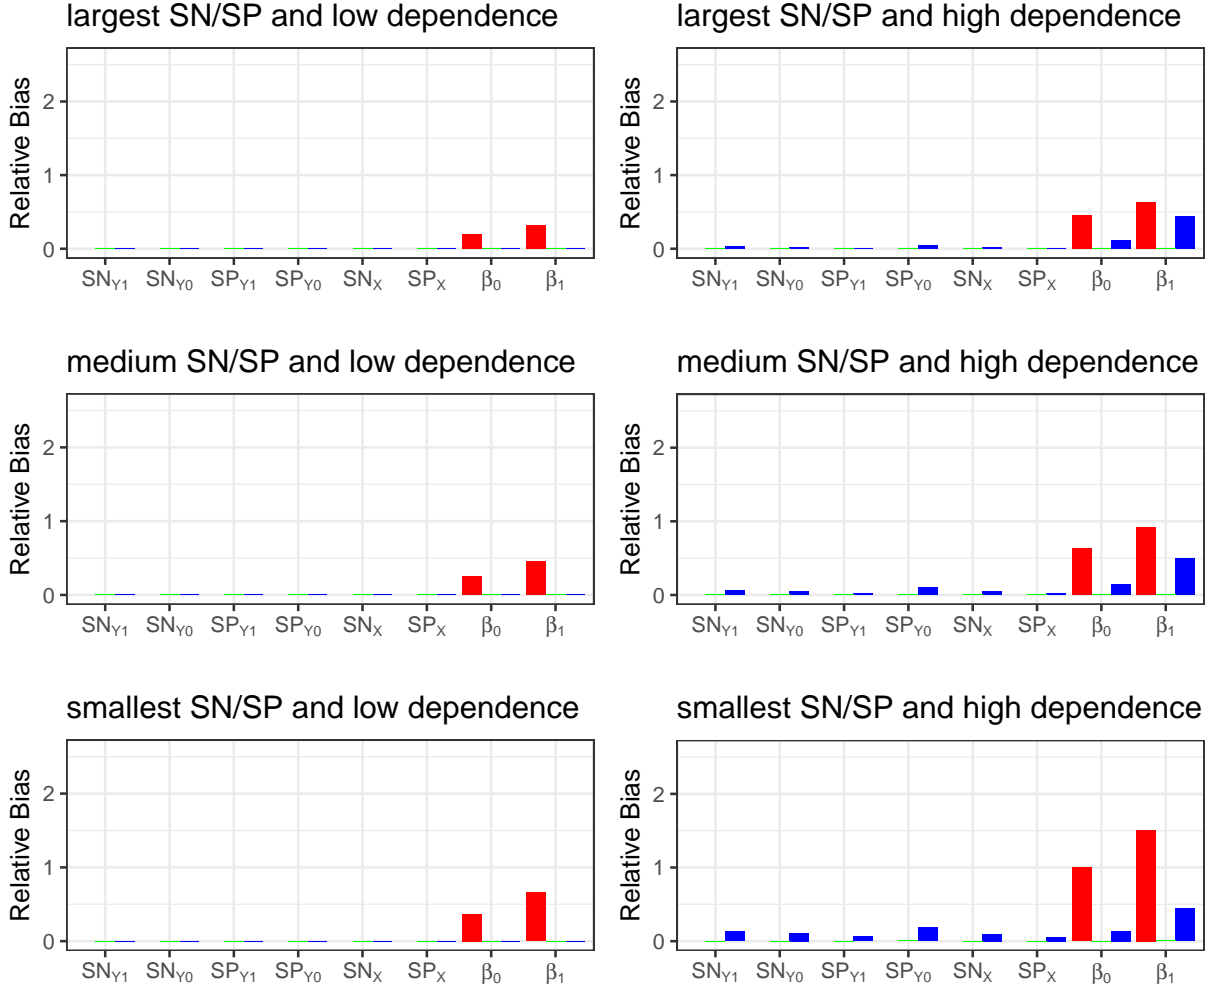

Figure S.3: Relative bias of model parameters when  $Y$  is subject to differential misclassification error and  $X$  is subject to nondifferential misclassification error with  $n_v/n = 50\%$ : red for naïve model, blue for independent misclassification error model, green for dependent misclassification model.



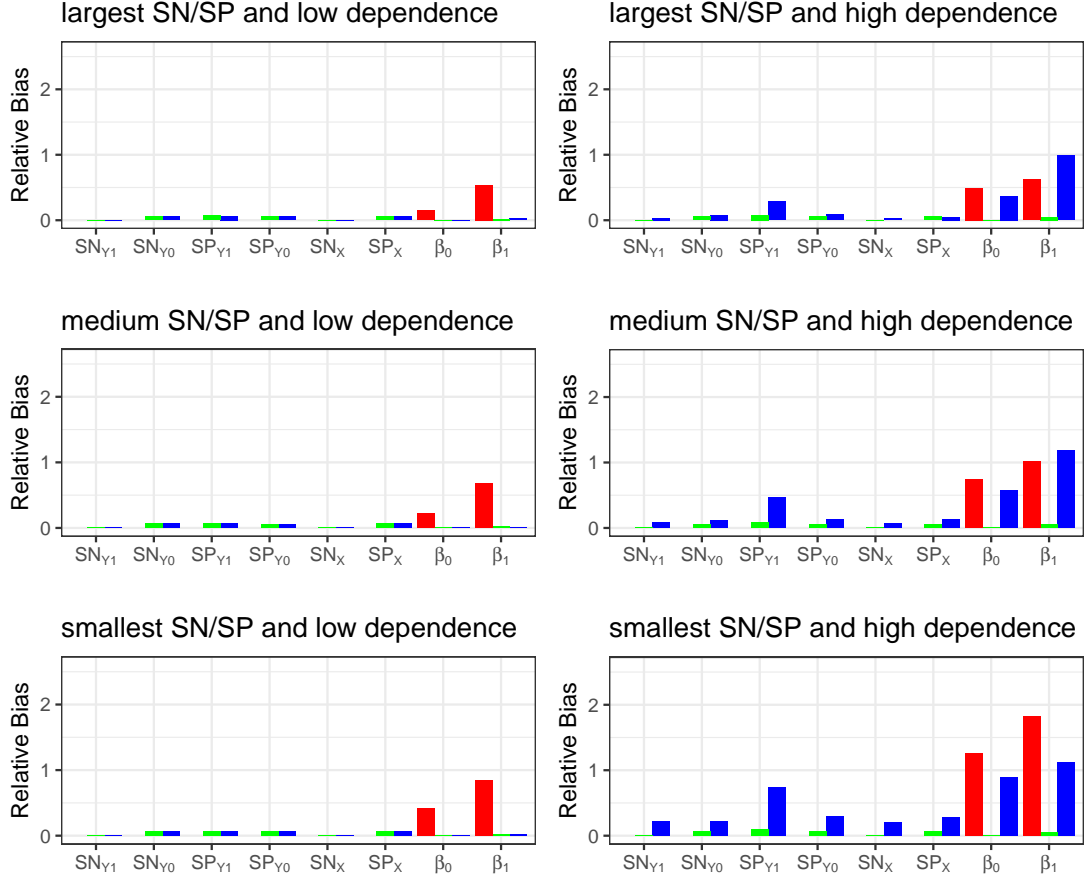

Figure S.4: Relative bias of model parameters when  $Y$  is subject to nondifferential misclassification error and  $X$  is subject to differential misclassification error with  $n_v/n = 10\%$ : red for naïve model, blue for independent misclassification error model, green for dependent misclassification model.

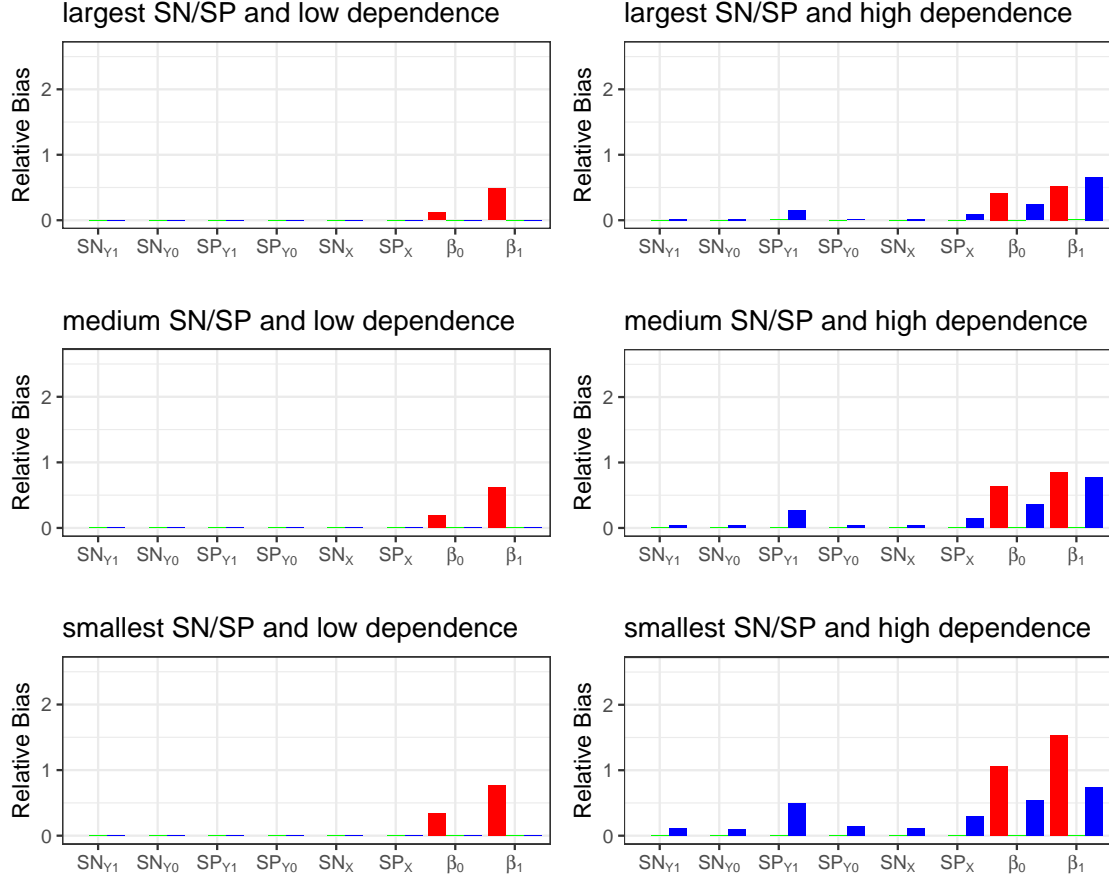

Figure S.5: Relative bias of model parameters when  $Y$  is subject to nondifferential misclassification error and  $X$  is subject to differential misclassification error with  $n_v/n = 30\%$ : red for naïve model, blue for independent misclassification error model, green for dependent misclassification model.

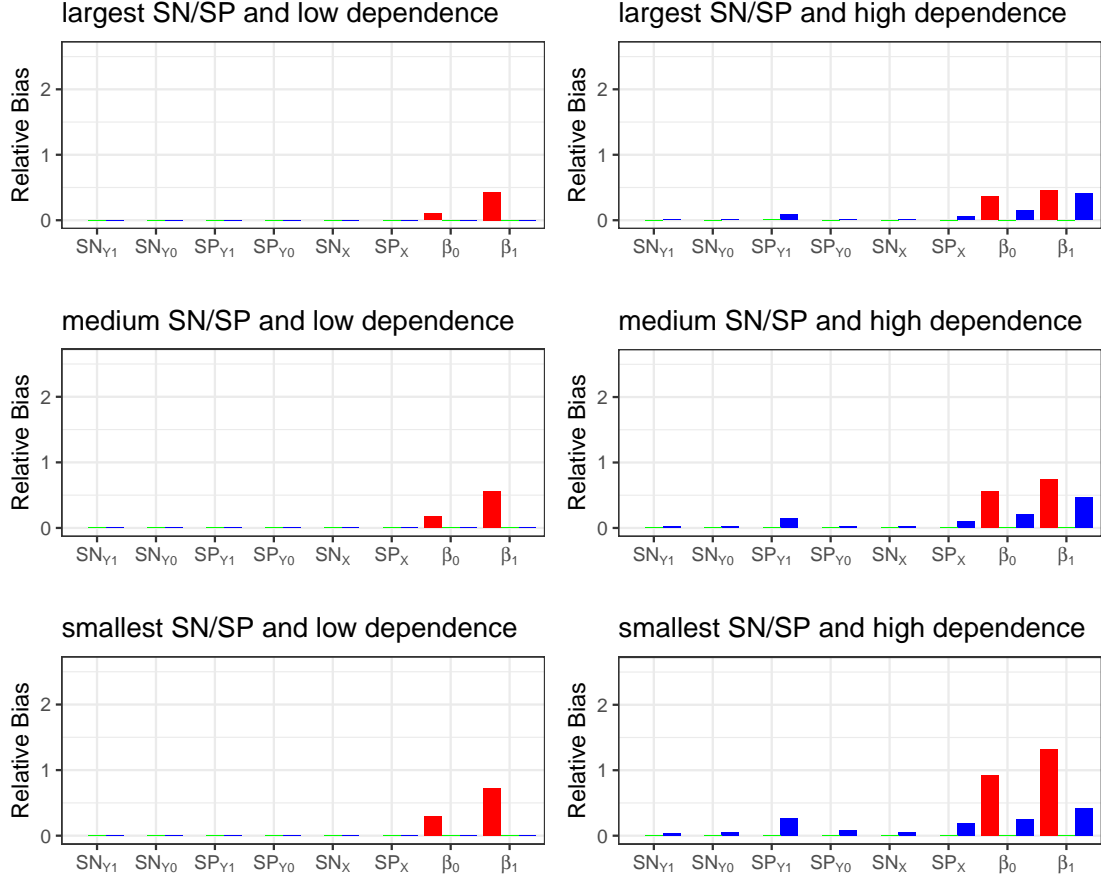

Figure S.6: Relative bias of estimated parameters when  $Y$  is subject to nondifferential misclassification error and  $X$  is subject to differential misclassification error with  $n_v/n = 50\%$ : red for naïve model, blue for independent misclassification error model, green for dependent misclassification model.

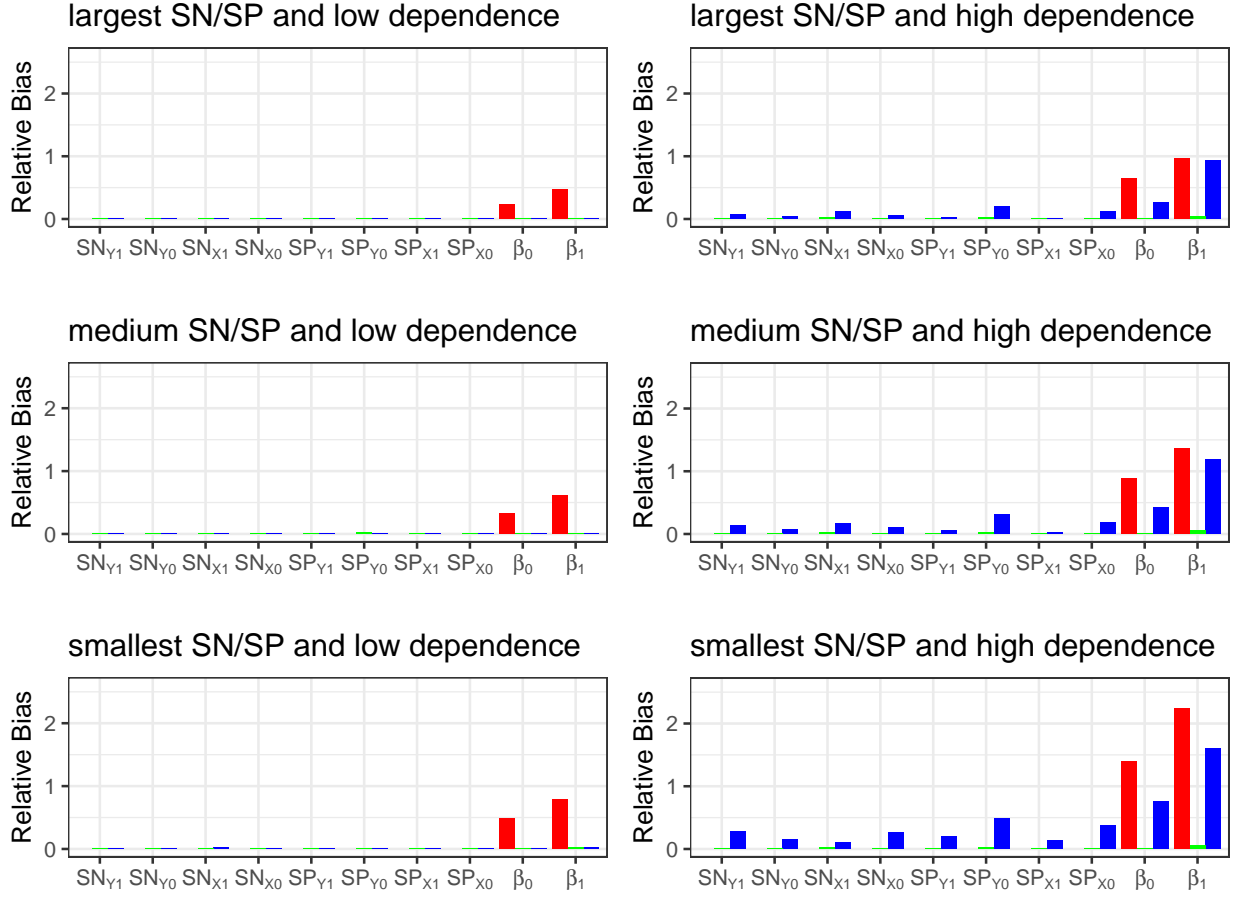

Figure S.7: Relative bias of model parameters when both  $Y$  and  $X$  are subject to differential misclassification errors with  $n_v/n = 10\%$ : red for naïve model, blue for independent misclassification error model, green for dependent misclassification model.

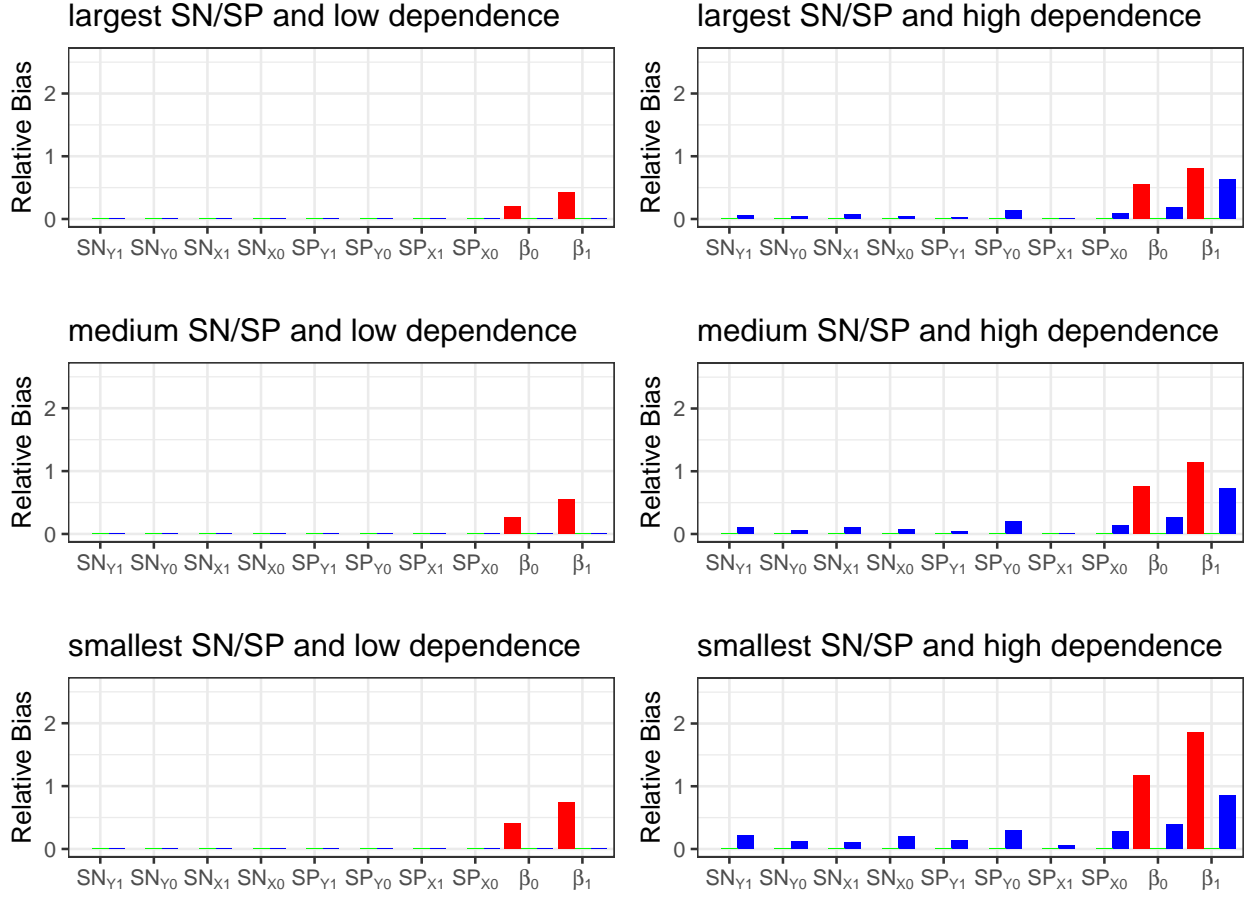

Figure S.8: Relative bias of model parameters when both  $Y$  and  $X$  are subject to differential misclassification errors with  $n_v/n = 30\%$ : red for naïve model, blue for independent misclassification error model, green for dependent misclassification model.

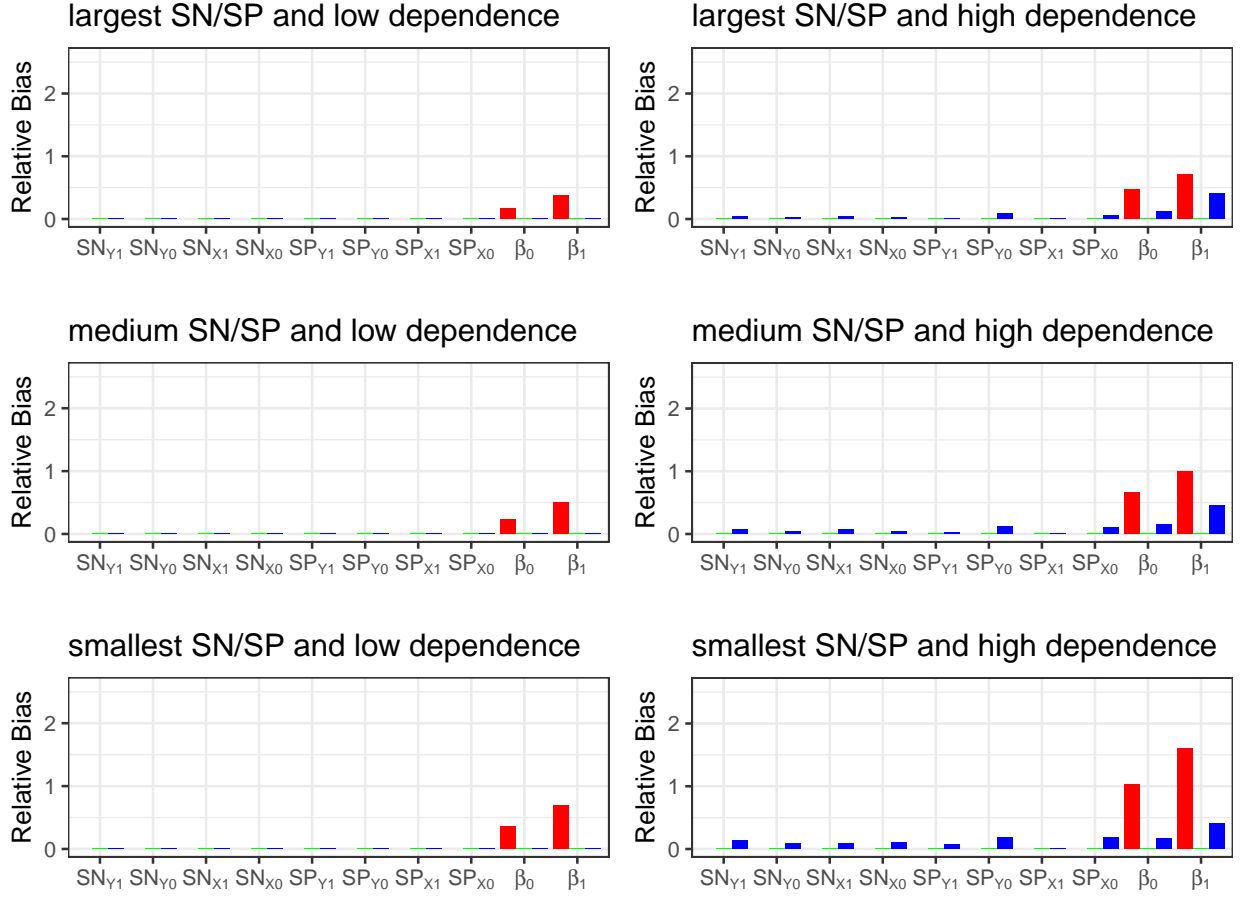

Figure S.9: Relative bias of model parameters when both  $Y$  and  $X$  are subject to differential misclassification errors with  $n_v/n = 50\%$ : red for naïve model, blue for independent misclassification error model, green for dependent misclassification model.

## 2.2 Categorical variables

Here are the plots for the simulation scenario in Section 4.2 when  $Y$ ,  $X$ ,  $Y^*$ , and  $X^*$  are all trinary variables.

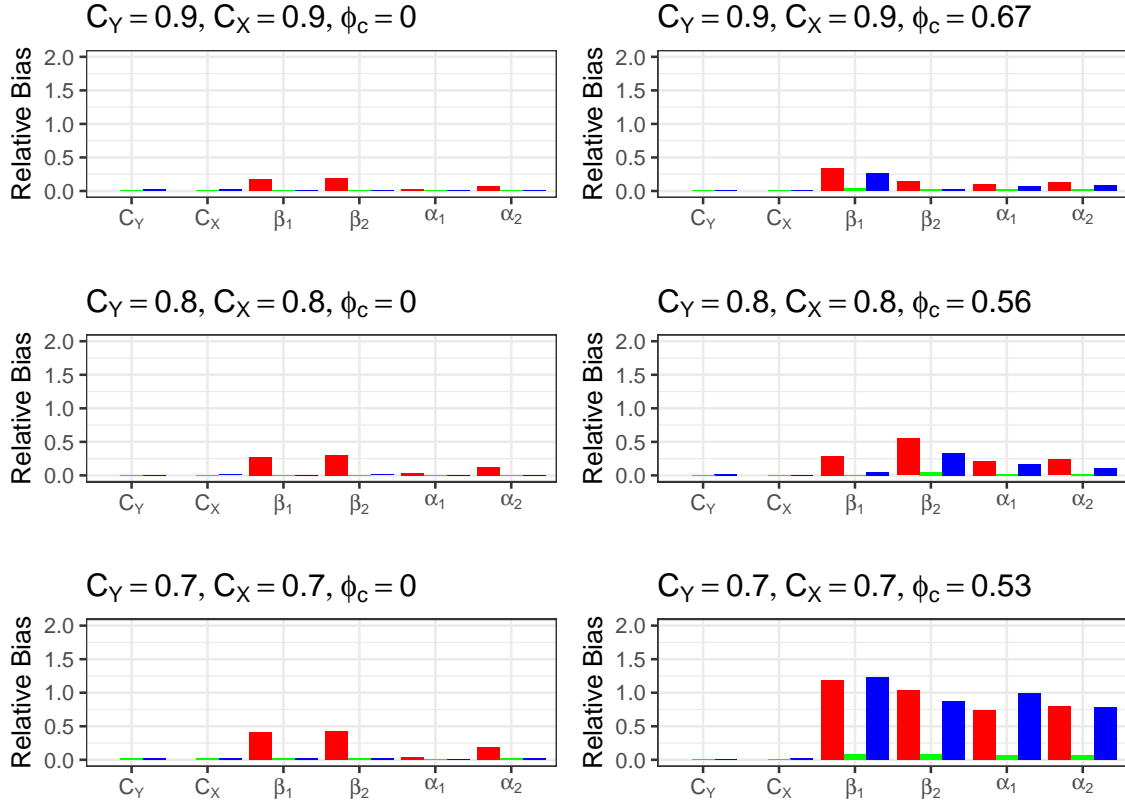

Figure S.10: Relative bias of estimated parameters when both  $Y$  and  $X$  are trinary variables with  $n_v/n = 10\%$ .

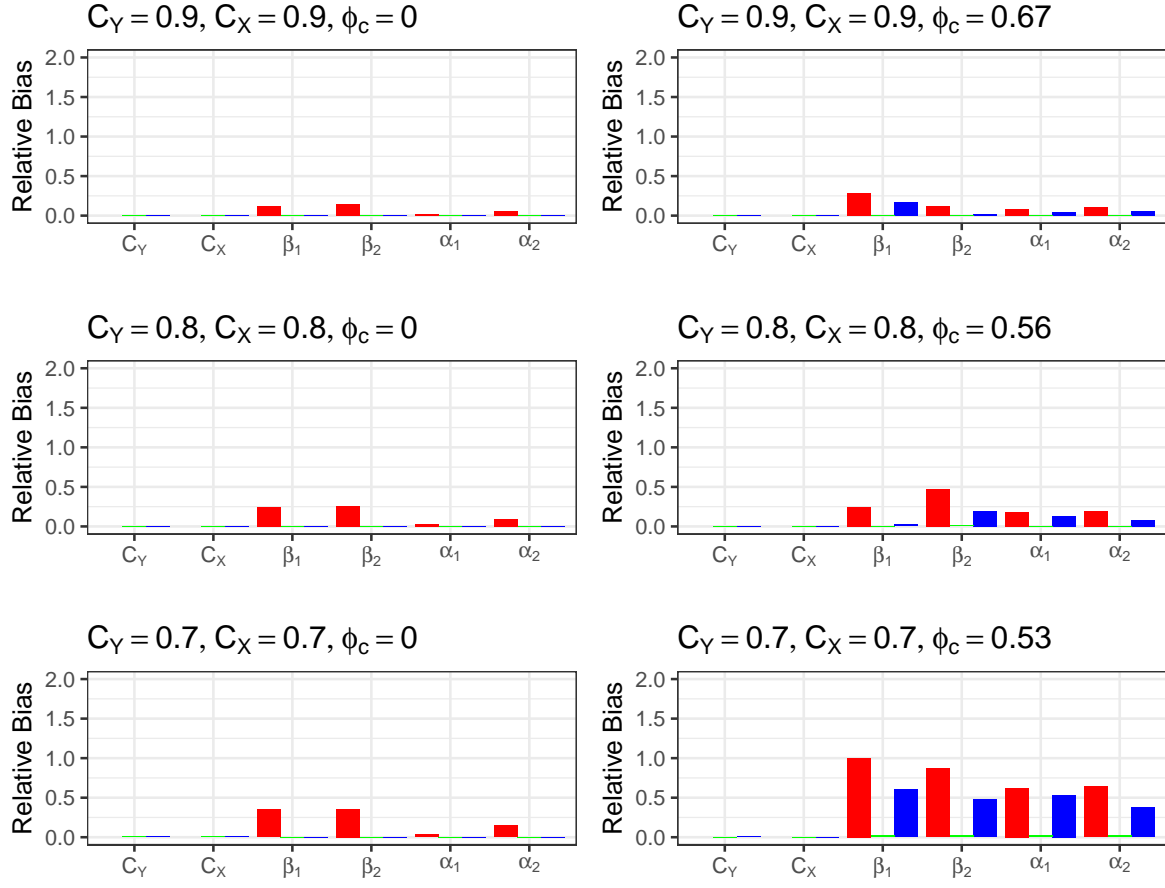

Figure S.11: Relative bias of estimated parameters when both  $Y$  and  $X$  are trinary variables with  $n_v/n = 30\%$ .



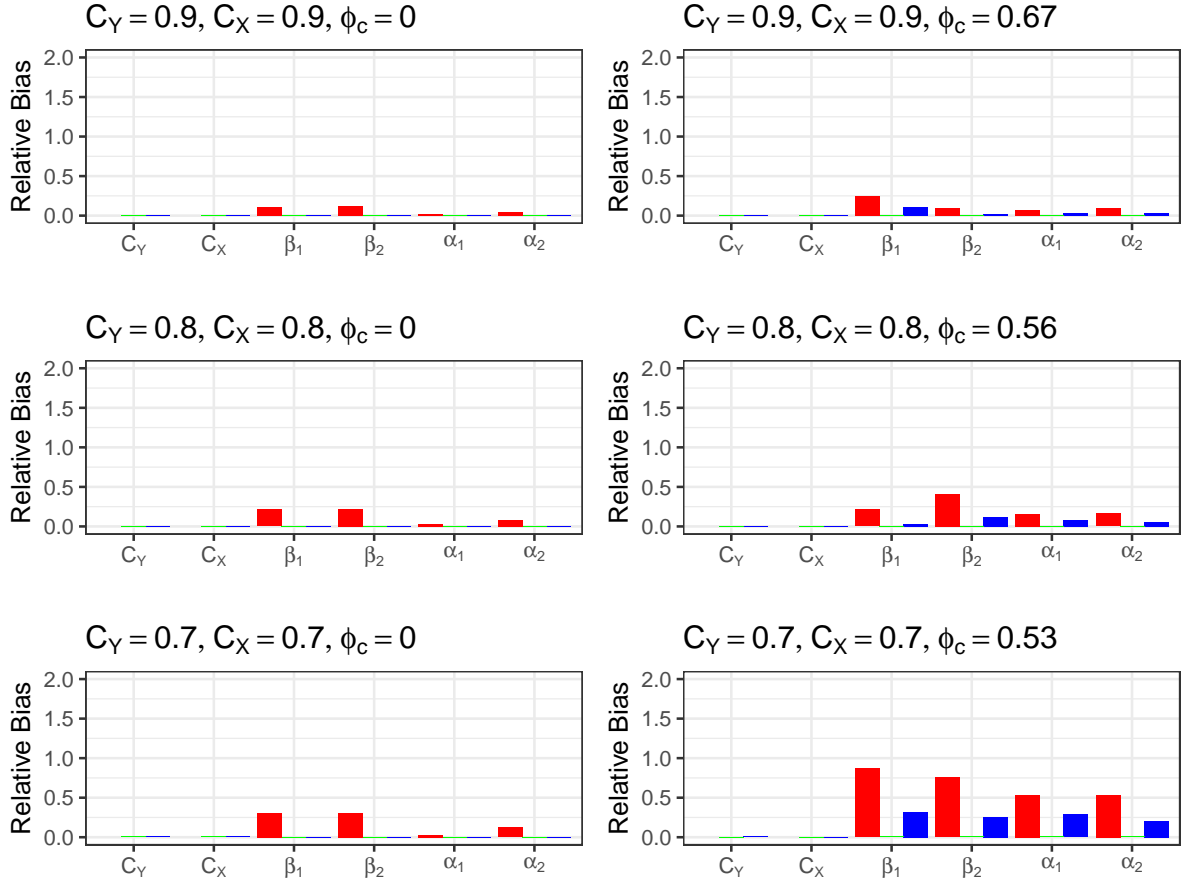

Figure S.12: Relative bias of estimated parameters when both  $Y$  and  $X$  are trinary variables with  $n_v/n = 50\%$ .
